# Supplementary material for: Evolution of the coronavirus spike protein in the full-length genome and defective viral genome under diverse selection pressures
Source: PubMed Central journal article supplement (PMC10768696; doi:10.1099/jgv.0.001920), 2023-11-24
Supplement: jgv-104-1920-s001.pdf [file jgv-104-1920-s001.pdf]

## Supplementary Materials for

### **The evolution of the coronavirus spike protein in the full-length genome and defective viral genome under diverse selection pressures**

Ching-Hung Lin<sup>1a</sup>, Hon-Man-Herman Tam<sup>2a</sup>, Cheng-Yao Yang<sup>1</sup>, Feng-Cheng Hsieh<sup>1</sup>, Jiun-Long Wang<sup>3,4,5</sup>, Chun-Chun Yang<sup>1</sup>, Hsuan-Wei Hsu<sup>1</sup>, Hao-Ping Liu<sup>2\*</sup> and Hung-Yi Wu<sup>1\*</sup>

a: Equal contributors

**1** Graduate Institute of Veterinary Pathobiology, College of Veterinary Medicine, National Chung Hsing University, Taichung 40227, Taiwan

**2** Department of Veterinary Medicine, College of Veterinary Medicine, National Chung Hsing University, Taichung 40227, Taiwan

**3** Division of Chest Medicine, Department of Internal Medicine, Taichung Veterans General Hospital, Taichung 40705, Taiwan

**4** Department of Post-Baccalaureate Medicine, College of Medicine, National Chung Hsing University, Taichung 40227, Taiwan

**5** Department of Life Sciences, National Chung Hsing University, Taichung 40227, Taiwan

\*Corresponding Author

Corresponding Footnote: Graduate Institute of Veterinary Pathobiology and Department of Veterinary Medicine, College of Veterinary Medicine, National Chung Hsing University, Taichung 40227, Taiwan

Telephone: 886-4-22840369; Fax: 886-4-22862073

Email: [hwu2@dragon.nchu.edu.tw](mailto:hwu2@dragon.nchu.edu.tw); [hpliu@dragon.nchu.edu.tw](mailto:hpliu@dragon.nchu.edu.tw)

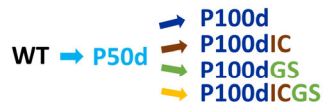

|           | a. a. position |    |     |     |     |     |     |     |     |     |     |      |      |
|-----------|----------------|----|-----|-----|-----|-----|-----|-----|-----|-----|-----|------|------|
| viruses   | 25             | 91 | 146 | 175 | 463 | 540 | 544 | 608 | 694 | 796 | 803 | 1086 | 1289 |
| WT        | S              | F  | N   | N   | Q   | T   | T   | D   | H   | G   | T   | Q    | Q    |
| P50d      | S              | F  | N   | K   | Q   | T   | K   | D   | H   | G   | I   | Q    | Q    |
| P100d     | F              | S  | N   | K   | H   | K   | K   | G   | H   | V   | T   | Q    | Q    |
| P100dIC   | S              | F  | K   | K   | H   | K   | K   | G   | H   | V   | T   | Q    | H    |
| P100dGS   | S              | F  | K   | K   | H   | K   | K   | G   | H   | V   | T   | Q    | Q    |
| P100dICGS | S              | F  | N   | K   | H   | T   | K   | D   | H   | G   | I   | Q    | Q    |

**Fig. S1. Amino acid sequence analysis of the S protein gene in the BCoV full-length genome under diverse selection pressure(s).** The mutated amino acids are indicated in red. WT, wild-type BCoV without selection pressure; P50d, persistence at 50 d; P100d, persistence at 100 d; P100dIC, persistence and innate immunity treatment at 100 d; P100dGS, persistence and antiviral treatment at 100 d; P100dICGS, persistence, innate immunity and antiviral treatment at 100 d. a.a., amino acid.



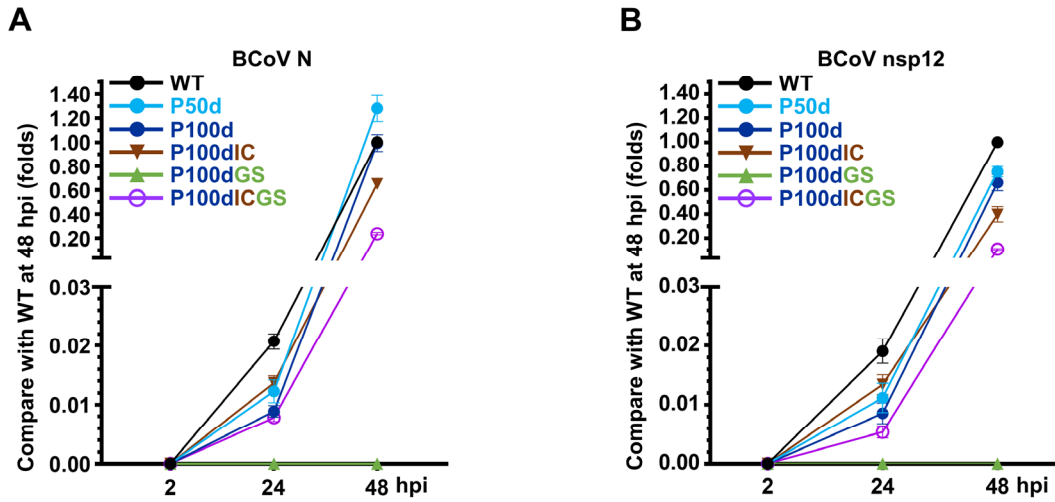

**Fig. S3. The relative replication efficiency between the WT and variants, including P50d, P100d, P100dIC, P100dGS and P100dICGS under regular infection conditions, as quantitated by RT-qPCR for N protein (A) and nsp12 genes (B). hpi, hours postinfection. The values represent the means  $\pm$  SDs from three individual experiments. \*\*\* $p < 0.001$ .**

| S1              |    |    |    |     |     |     |    |    |     |     |    |    |    |     |     |
|-----------------|----|----|----|-----|-----|-----|----|----|-----|-----|----|----|----|-----|-----|
| a. a. position  |    |    |    |     |     |     |    |    |     |     |    |    |    |     |     |
| virus strains   | 18 | 19 | 20 | 24  | 25  | 26  | 27 | 67 | 69  | 70  | 80 | 83 | 95 | 138 | 142 |
| Wuhan           | L  | T  | T  | L   | P   | P   | A  | A  | H   | V   | D  | V  | T  | D   | G   |
| Alpha           | L  | T  | T  | L   | P   | P   | A  | A  | del | del | D  | V  | T  | D   | G   |
| Beta            | L  | T  | T  | L   | P   | P   | A  | A  | H   | V   | A  | V  | T  | D   | G   |
| Gamma           | F  | T  | N  | L   | P   | S   | A  | A  | H   | V   | D  | V  | T  | Y   | G   |
| Delta           | L  | R  | T  | L   | P   | P   | A  | A  | H   | V   | D  | V  | T  | D   | G   |
| Omicron BA.1    | L  | T  | T  | L   | P   | P   | A  | V  | del | del | D  | V  | I  | D   | D   |
| Omicron BA.2.75 | L  | I  | T  | del | del | del | S  | A  | H   | V   | D  | A  | T  | D   | D   |
| Omicron XXB.1.5 | L  | I  | T  | del | del | del | S  | A  | H   | V   | D  | V  | T  | D   | D   |
| Omicron BA.5    | L  | I  | T  | del | del | del | S  | A  | del | del | D  | V  | T  | D   | D   |
| Omicron BQ1.1   | L  | I  | T  | del | del | del | S  | A  | del | del | D  | V  | T  | D   | D   |

  

| S1              |     |     |     |     |     |     |     |     |     |     |     |     |     |     |     |
|-----------------|-----|-----|-----|-----|-----|-----|-----|-----|-----|-----|-----|-----|-----|-----|-----|
| a. a. position  |     |     |     |     |     |     |     |     |     |     |     |     |     |     |     |
| virus strains   | 143 | 144 | 145 | 146 | 147 | 152 | 156 | 157 | 158 | 183 | 190 | 210 | 211 | 212 | 213 |
| Wuhan           | V   | Y   | Y   | H   | K   | W   | E   | F   | F   | Q   | R   | I   | N   | L   | V   |
| Alpha           | V   | del | Y   | H   | K   | W   | E   | F   | F   | Q   | R   | I   | N   | L   | V   |
| Beta            | V   | Y   | Y   | H   | K   | W   | E   | F   | F   | Q   | R   | I   | N   | L   | V   |
| Gamma           | V   | Y   | Y   | H   | K   | W   | E   | F   | F   | Q   | S   | I   | N   | L   | V   |
| Delta           | V   | Y   | Y   | H   | K   | W   | del | del | G   | Q   | R   | I   | N   | L   | V   |
| Omicron BA.1    | del | del | del | H   | K   | W   | E   | F   | F   | Q   | R   | I   | del | I   | V   |
| Omicron BA.2.75 | V   | Y   | Y   | H   | E   | R   | E   | L   | F   | E   | R   | V   | N   | L   | G   |
| Omicron XXB.1.5 | V   | del | Y   | Q   | K   | W   | E   | F   | F   | Q   | R   | I   | N   | L   | E   |
| Omicron BA.5    | V   | Y   | Y   | H   | K   | W   | E   | F   | F   | Q   | R   | I   | N   | L   | G   |
| Omicron BQ1.1   | V   | Y   | Y   | H   | K   | W   | E   | F   | F   | Q   | R   | I   | N   | L   | G   |

  

| S1              |     |     |     |     |     |     |     |     |     |     |     |     |     |     |     |
|-----------------|-----|-----|-----|-----|-----|-----|-----|-----|-----|-----|-----|-----|-----|-----|-----|
| a. a. position  |     |     |     |     |     |     |     |     |     |     |     |     |     |     |     |
| virus strains   | 252 | 275 | 339 | 346 | 368 | 371 | 373 | 375 | 376 | 405 | 408 | 417 | 440 | 444 | 445 |
| Wuhan           | G   | G   | G   | R   | L   | S   | S   | S   | T   | D   | R   | K   | N   | K   | V   |
| Alpha           | G   | G   | G   | R   | L   | S   | S   | S   | T   | D   | R   | K   | N   | K   | V   |
| Beta            | G   | G   | G   | R   | L   | S   | S   | S   | T   | D   | R   | N   | N   | K   | V   |
| Gamma           | G   | G   | G   | R   | L   | S   | S   | S   | T   | D   | R   | N/T | N   | K   | V   |
| Delta           | G   | G   | G   | R   | L   | S   | S   | S   | T   | D   | R   | K   | N   | K   | V   |
| Omicron BA.1    | G   | G   | D   | R   | L   | L   | P   | F   | T   | D   | R   | N   | K   | K   | V   |
| Omicron BA.2.75 | G   | S   | H   | R   | L   | F   | P   | F   | A   | N   | S   | N   | K   | K   | V   |
| Omicron XXB.1.5 | V   | G   | H   | T   | I   | F   | P   | F   | A   | N   | S   | N   | K   | K   | P   |
| Omicron BA.5    | G   | G   | D   | R   | L   | F   | P   | F   | A   | N   | S   | N   | K   | K   | V   |
| Omicron BQ1.1   | G   | G   | D   | T   | L   | F   | P   | F   | A   | N   | S   | N   | K   | T   | V   |

  

| S1              |     |     |     |     |     |     |     |     |     |     |     |     |     |     |     |
|-----------------|-----|-----|-----|-----|-----|-----|-----|-----|-----|-----|-----|-----|-----|-----|-----|
| a. a. position  |     |     |     |     |     |     |     |     |     |     |     |     |     |     |     |
| virus strains   | 446 | 452 | 460 | 478 | 484 | 486 | 490 | 493 | 496 | 498 | 501 | 505 | 547 | 570 | 614 |
| Wuhan           | G   | L   | N   | T   | E   | F   | F   | Q   | G   | Q   | N   | Y   | T   | A   | D   |
| Alpha           | G   | L   | N   | T   | K   | F   | F   | Q   | G   | Q   | Y   | Y   | T   | A   | G   |
| Beta            | G   | L   | N   | T   | K   | F   | F   | Q   | G   | Q   | Y   | Y   | T   | A   | G   |
| Gamma           | G   | L   | N   | T   | K   | F   | F   | Q   | G   | Q   | Y   | Y   | T   | A   | G   |
| Delta           | G   | R   | N   | K   | E   | F   | F   | Q   | G   | Q   | N   | Y   | T   | A   | G   |
| Omicron BA.1    | S   | L   | N   | K   | A   | F   | F   | R   | S   | R   | Y   | H   | K   | A   | G   |
| Omicron BA.2.75 | S   | L   | K   | K   | A   | F   | F   | Q   | G   | R   | Y   | H   | T   | A   | G   |
| Omicron XXB.1.5 | S   | L   | K   | K   | A   | P   | S   | Q   | G   | R   | Y   | H   | T   | A   | G   |
| Omicron BA.5    | G   | R   | N   | K   | A   | V   | F   | Q   | G   | R   | Y   | H   | T   | A   | G   |
| Omicron BQ1.1   | G   | R   | K   | K   | A   | V   | F   | Q   | G   | R   | Y   | H   | T   | A   | G   |

  

| S1              |     |     | S2             |     |     |     |     |     |     |     |     |     |     |      |      |      |
|-----------------|-----|-----|----------------|-----|-----|-----|-----|-----|-----|-----|-----|-----|-----|------|------|------|
| a. a. position  |     |     | a. a. position |     |     |     |     |     |     |     |     |     |     |      |      |      |
| virus strains   | 655 | 679 | 681            | 701 | 716 | 764 | 796 | 856 | 950 | 954 | 969 | 981 | 982 | 1027 | 1118 | 1176 |
| Wuhan           | H   | N   | P              | A   | T   | N   | D   | N   | D   | Q   | N   | L   | S   | T    | D    | V    |
| Alpha           | H   | N   | H              | A   | I   | N   | D   | N   | D   | Q   | N   | L   | A   | T    | H    | V    |
| Beta            | H   | N   | P              | V   | T   | N   | D   | N   | D   | Q   | N   | L   | S   | T    | D    | V    |
| Gamma           | Y   | N   | P              | A   | T   | N   | D   | N   | D   | Q   | N   | L   | S   | I    | D    | F    |
| Delta           | H   | N   | R              | A   | T   | N   | D   | N   | N   | Q   | N   | F   | S   | T    | D    | V    |
| Omicron BA.1    | Y   | K   | H              | A   | T   | K   | Y   | K   | D   | H   | K   | L   | S   | T    | D    | V    |
| Omicron BA.2.75 | Y   | K   | H              | A   | T   | K   | Y   | N   | D   | H   | K   | L   | S   | T    | D    | V    |
| Omicron XXB.1.5 | Y   | K   | H              | A   | T   | K   | Y   | N   | D   | H   | K   | L   | S   | T    | D    | V    |
| Omicron BA.5    | Y   | K   | H              | A   | T   | K   | Y   | N   | D   | H   | K   | L   | S   | T    | D    | V    |
| Omicron BQ1.1   | Y   | K   | H              | A   | T   | K   | Y   | N   | D   | H   | K   | L   | S   | T    | D    | V    |

**Fig. S4. Sequencing analysis of the S protein in SARS-CoV-2 full-length genome during pandemics.** SARS-CoV-2 reference genomes: Wuhan, GenBank: NC\_045512.2; Alpha B.1.1.7,

GenBank: QWE88920.1; Beta B.1.351, GenBank: QRN78347.1; Gamma P.1, GenBank: QRX39425.1; Delta B.1.617.2, GenBank: QUD52764.1; Omicron BA.1, GenBank: UFO69279.1; Omicron BA.2.75, GenBank: UTM82166.1; Omicron XBB.1.5, GenBank: UZG29433.1; Omicron BA.5, GenBank: UOZ45804.1; Omicron BQ.1.1, GenBank: UWM38596.1). Emergence: Alpha B.1.1.7 (UK, Sep 2020); Beta, B.1.351 (South Africa, Aug 2020); Gamma P.1 (Brazil, Jul 2020); Delta B.1.617.2 (India, Dec 2020); Omicron BA.1 (South Africa, Dec 2021); Omicron BA.2.75 (India, spring 2022); Omicron XBB.1.5 (USA, Nov 2022); Omicron BA.5 (South Africa, Jan 2022); BQ.1.1 (Nigeria, Jul 2022).

**Table S1. Oligonucleotides used in the study**

| Oligonucleotides <sup>a</sup> | Polarity <sup>b</sup> | Sequence (5' to 3')            |
|-------------------------------|-----------------------|--------------------------------|
| BCV 809(+)                    | —                     | cgttatgatctttattgtagg          |
| BCV 1050(+)                   | —                     | gctccaaataggaataatgcc          |
| BCV 1365(+)                   | —                     | ctgttcgcagtcaatataaccaaactgc   |
| BCV 1637(+)                   | —                     | cgtgctggactccaatacac           |
| BCV 1992(+)                   | —                     | caaataatatgcgcgcggaacc         |
| BCV 3114(+)                   | —                     | gtcatcatcttcaggagctg           |
| BCV 21000(+)                  | —                     | gtactcccctatgttcttag           |
| BCV 21637(+)                  | —                     | gcaagactaatgtgcggcgctg         |
| BCV 24146(+)                  | —                     | ccaactgtgattacatgc             |
| BCV 24239(+)                  | —                     | gtaatcagcattcacatcatatg        |
| BCV 24286(+)                  | —                     | gcataaaaagtaccacc              |
| BCV 24423(+)                  | —                     | ccaatattctaaagtcatagc          |
| BCV 24556(+)                  | —                     | cgtttaattcataaacacc            |
| BCV 24648(+)                  | —                     | gcaccgacttatcattaagc           |
| BCV 24778(+)                  | —                     | cacataccatatacttagc            |
| BCV 25229(+)                  | —                     | cattgggcagcattatggcaag         |
| BCV 25753(+)                  | —                     | cgttaattgcatttaattccg          |
| BCV 26047(+)                  | —                     | cctatagtaaactctgaagg           |
| BCV 26298(+)                  | —                     | cgtctacattgaaattaacg           |
| BCV 26548(+)                  | —                     | ggtggcagccaaagtgtatcc          |
| BCV 26908(+)                  | —                     | gtctgtctatctgagcttgcttc        |
| BCV 27038(+)                  | —                     | ccattaccacaaaaattatcc          |
| BCV 27853(+)                  | —                     | gttatataagacacagtaccac         |
| BCV 27979(+)                  | —                     | cagtggctgctagtgtcaatacc        |
| BCV END 2(+)                  | —                     | gtgattctccaattggccataattaacttc |

*a* The positive symbols in the oligonucleotide names indicate the polarities of the nucleic acids to which the oligonucleotides anneal.

*b* Polarity of the oligonucleotide relative to the positive-strand viral genome.

**Table S1. Oligonucleotides used in the study (Continued)**

| Oligonucleotides <sup>a</sup> | Polarity <sup>b</sup> | Sequence (5' to 3')               |
|-------------------------------|-----------------------|-----------------------------------|
| BCV 20(-)                     | +                     | gattgtgagcgattgcgtgc              |
| BCV 7-32(-)                   | +                     | gagcgattgcgtgcgtgcaccccgttcaact   |
| BCV 21-51(-)                  | +                     | cgtgcaccccgttcaactgatctctgttag    |
| BCV 39(-)                     | +                     | gatctctgttagatcttttataatctaaactta |
| BCV 81(-)                     | +                     | catccactccctgtattctatgcttgtggg    |
| BCV 126(-)                    | +                     | gtggtgtctatattcattc               |
| BCV 157(-)                    | +                     | gctttcagccaggacgtgtgtatcctaggc    |
| BCV 426(-)                    | +                     | gcagctagcctaatacgtg               |
| BCV 443 (-)                   | +                     | gtgaaattgtatgaatacacg             |
| BCV 450(-)                    | +                     | tggtatgaatacacgtccatag            |
| BCV 500(-)                    | +                     | tgcagtcccgcgaagcagtttgg           |
| BCV 550(-)                    | +                     | gaggcatgctatgtgagaggtgt           |
| BCV 577(-)                    | +                     | cctaattggatggaccatgggttg          |
| BCV 590(-)                    | +                     | ccatgggttgttcggcgtagaa            |
| BCV 628(-)                    | +                     | ggtcgttgctgttaacaagc              |
| BCV 650(-)                    | +                     | atgtggcctatcagctatatatga          |
| BCV 679(-)                    | +                     | cctgcgggtgtctgtttgg               |
| BCV 700(-)                    | +                     | gcaggtcaattgtgggttgggtt           |
| BCV 750(-)                    | +                     | atcccgaaatttattgttcttg            |
| BCV 770(-)                    | +                     | cttgggttatgtactgcgtaagt           |
| BCV 780(-)                    | +                     | gtacttgcgtaagtgtggcgaaaa          |
| BCV 850(-)                    | +                     | tataattttaaagttgaggatgct          |
| BCV 862(-)                    | +                     | ggtgaggatgcttacgacctg             |
| BCV 879(-)                    | +                     | cctggtcatgatgagcctaag             |
| BCV 900(-)                    | +                     | gggtaagtttctaagaaggctta           |
| BCV 950(-)                    | +                     | ttaaaccgcttctatgtagacc            |
| BCV 979(-)                    | +                     | ggttgtgattatactggtgg              |
| BCV 1114(-)                   | +                     | cgtgatccacgttatgttatg             |
| BCV 1159(-)                   | +                     | cgtagtgtgcatatgttgc               |
| BCV 1246(-)                   | +                     | gactctatttttacgtcaac              |
| BCV 1302(-)                   | +                     | ggaggcagatgcagttgtaaagc           |
| BCV 1365(-)                   | +                     | gcagtttggtatattgactgc             |

<sup>a</sup> The negative symbols in the oligonucleotide names indicate the polarities of the nucleic acids to which the oligonucleotides anneal.

<sup>b</sup> Polarity of the oligonucleotide relative to the positive-strand viral genome.



**Table S1. Oligonucleotides used in the study (Continued)**

| Oligonucleotides <sup>a</sup> | Polarity <sup>b</sup> | Sequence (5' to 3')       |
|-------------------------------|-----------------------|---------------------------|
| BCV 1402(-)                   | +                     | gactgcgaacaagacttgtgtg    |
| BCV 1536(-)                   | +                     | gagtgcagcaggttatgggg      |
| BCV 2002(-)                   | +                     | ggcaagcattttgtgactacg     |
| BCV 23341(-)                  | +                     | ggatgctggtttactagc        |
| BCV 23415(-)                  | +                     | ggtatgataatgtagcagtg      |
| BCV 23498(-)                  | +                     | cctatttgtgtatgatcc        |
| BCV 23730(-)                  | +                     | caccggtgctcctctattagcac   |
| BCV 23953(-)                  | +                     | gctaaggtcaaaaataccaagg    |
| BCV 24270(-)                  | +                     | ccattttatcaagaagggtg      |
| BCV 24607(-)                  | +                     | cgacgtatacctaacttcc       |
| BCV 24647(-)                  | +                     | ggcttaatgataagtcgggcctc   |
| BCV 24775(-)                  | +                     | gctgctaagatatggatg        |
| BCV 25171(-)                  | +                     | ggtataggcacttgcctgc       |
| BCV 25310(-)                  | +                     | gcataggtgagcactgttcgg     |
| BCV 25543(-)                  | +                     | gatctttatggattacagg       |
| BCV 26026(-)                  | +                     | ggtttgtatgaaattcaatacc    |
| BCV 26051(-)                  | +                     | cagagttactataggaatatggagg |
| BCV 26650(-)                  | +                     | gtgtaccatggatgtgtaagtc    |
| BCV 26710(-)                  | +                     | gctcttgatgctattcaggaagg   |
| BCV 27128(-)                  | +                     | ctactaagtatgtcactgcg      |
| BCV 27505(-)                  | +                     | cagagctacatcaatctcaagg    |

*a* The negative symbols in the oligonucleotide names indicate the polarities of the nucleic acids to which the oligonucleotides anneal.

*b* Polarity of the oligonucleotide relative to the positive-strand viral genome.

**Table S2. Oligonucleotides used for RT-qPCR**

| Oligonucleotides <sup>a</sup> | Polarity <sup>b</sup> | Sequence (5' to 3')             |
|-------------------------------|-----------------------|---------------------------------|
| BCV 14427(-)                  | —                     | gctgctgatccagctttgcatgtagc      |
| BCV 14588(+)                  | +                     | cagatcaactgaactaccctctttaagcagg |
| BCV 29397(-)                  | —                     | atgtcttttactcctggtaagcaa        |
| BCV 29590(+)                  | +                     | gaaactgagtaattccagagaacc        |
| H18s rRNA(-)                  | —                     | cattcgaacgtctgcctatc            |
| H18s rRNA(+)                  | +                     | gcctgctgccttccttggatgtgtagcc    |

*a* The positive and negative symbols in the oligonucleotide names indicate the polarities of the nucleic acids to which the oligonucleotides anneal.

*b* Polarity of the oligonucleotide relative to the positive-strand viral genome.
